# Supplementary material for: Patterns of mental disorders in a nationwide child psychiatric sample (N=67,815): A DREAMS study
Source: medRxiv preprint, doi:10.1101/2024.02.29.24303557, version 1 (2024-03-02)
Supplement: Supplemental table 4 [file 303557_file09.pdf]

Table S 4. Primary and five year comorbid DSM-5 diagnoses in males ( $N = 29,655$ ).

[illegible]
