# Supplementary material for: Patterns of mental disorders in a nationwide child psychiatric sample (N=67,815): A DREAMS study
Source: medRxiv preprint, doi:10.1101/2024.02.29.24303557, version 1 (2024-03-02)
Supplement: Supplemental table 7 [file 303557_file12.pdf]

Table S 7. Primary and five-year comorbid DSM-5 diagnoses by age at time of primary diagnosis: 13 through 23 years old ( $N = 32,513$ ).

[illegible]
