# Supplementary material for: Patterns of mental disorders in a nationwide child psychiatric sample (N=67,815): A DREAMS study
Source: medRxiv preprint, doi:10.1101/2024.02.29.24303557, version 1 (2024-03-02)
Supplement: Supplemental table 9 [file 303557_file14.pdf]

Table S 9. Primary and five year comorbid DSM-5 diagnoses in males aged 13 through 23 years at time of primary diagnosis ( $N = 18,432$ ).

[illegible]
