# Supplementary material for: Patterns of mental disorders in a nationwide child psychiatric sample (N=67,815): A DREAMS study
Source: bioRxiv or medRxiv preprint supplement (doi:10.1101/2024.02.29.24303557), 2024-03-02
Supplement: Supplementary file [file media-1.pdf]

Table S 1. Example of how DSM-diagnoses were harmonized into DSM-5 diagnostic classes.

| <b><u>Raw data</u></b><br><b>Diagnosis with subtype and specifiers</b>                                                                                                                                                                                                                                                                                         | <b><u>Step 1</u></b><br><b>Diagnosis without subtype and specifiers</b> | <b><u>Step 2</u></b><br><b>DSM-5 diagnostic class</b> |
|----------------------------------------------------------------------------------------------------------------------------------------------------------------------------------------------------------------------------------------------------------------------------------------------------------------------------------------------------------------|-------------------------------------------------------------------------|-------------------------------------------------------|
| <ul style="list-style-type: none"> <li>• Major depressive disorder, single episode, mild</li> <li>• Major depressive disorder, recurrent episode, severe with psychotic features</li> <li>• Persistent depressive disorder (dysthymic disorder), early onset</li> <li>• Persistent depressive disorder (dysthymic disorder), with atypical features</li> </ul> | <p>Major depressive disorder</p> <p>Persistent depressive disorder</p>  | <p>Depressive disorders</p>                           |
