# Supplementary material for: Patterns of mental disorders in a nationwide child psychiatric sample (N=67,815): A DREAMS study
Source: bioRxiv or medRxiv preprint supplement (doi:10.1101/2024.02.29.24303557), 2024-03-02
Supplement: Supplementary file [file media-2.pdf]

Table S 2. Prevalence of primary and five-year comorbid DSM-5 diagnoses in the total child and adolescent psychiatric sample ( $N = 48,342$ ).

| Primary diagnosis                                      | Comorbid diagnosis |       |                       |        |                                  |                                   |                                       |                   |                                                   |                     |                                    |                             |                                                        |                                            |                                       |                        |                  |                                                      |                      |                                           |                      |
|--------------------------------------------------------|--------------------|-------|-----------------------|--------|----------------------------------|-----------------------------------|---------------------------------------|-------------------|---------------------------------------------------|---------------------|------------------------------------|-----------------------------|--------------------------------------------------------|--------------------------------------------|---------------------------------------|------------------------|------------------|------------------------------------------------------|----------------------|-------------------------------------------|----------------------|
|                                                        | Total              |       | No comorbid diagnosis | V-code | Neurodevelopmental disorder: ASD | Neurodevelopmental disorder: ADHD | Trauma and stressor-related disorders | Anxiety disorders | Disruptive, impulse-control and conduct disorders | Depressive disorder | Neurodevelopmental disorder: other | Feeding and eating disorder | Neurodevelopmental disorder: intellectual disabilities | Obsessive-compulsive and related disorders | Somatic symptom and related disorders | Other mental disorders | Gender dysphoria | Schizophrenia spectrum and other psychotic disorders | Personality disorder | Substance-related and addictive disorders | Elimination disorder |
|                                                        | n                  | %     | %                     | %      | %                                | %                                 | %                                     | %                 | %                                                 | %                   | %                                  | %                           | %                                                      | %                                          | %                                     | %                      | %                | %                                                    | %                    | %                                         | %                    |
| Neurodevelopmental disorder: ASD                       | 16,470             | 34.1% | 47.8%                 | 25.3%  | -                                | 20.6%                             | 2.8%                                  | 4.8%              | 4.3%                                              | 4.6%                | 9.8%                               | 1.3%                        | 17.3%                                                  | 1.3%                                       | 0.6%                                  | 0.3%                   | 0.2%             | 0.4%                                                 | 0.4%                 | 0.4%                                      | 1.4%                 |
| Neurodevelopmental disorder: ADHD                      | 11,781             | 24.4% | 55.7%                 | 26.9%  | 8.4%                             | -                                 | 4.2%                                  | 3.6%              | 11.4%                                             | 2.5%                | 10.2%                              | 0.3%                        | 14.1%                                                  | 0.4%                                       | 0.3%                                  | 0.3%                   | 0.1%             | 0.1%                                                 | 0.6%                 | 0.8%                                      | 1.2%                 |
| Trauma and stressor-related disorders                  | 4,203              | 8.7%  | 52.4%                 | 33.8%  | 4.3%                             | 12.5%                             | -                                     | 5.3%              | 9.4%                                              | 8.4%                | 3.2%                               | 1.6%                        | 15.7%                                                  | 0.6%                                       | 0.9%                                  | 0.3%                   | 0.2%             | 0.4%                                                 | 2.0%                 | 2.1%                                      | 1.1%                 |
| Anxiety disorders                                      | 3,729              | 7.7%  | 60.6%                 | 25.6%  | 5.9%                             | 7.2%                              | 5.0%                                  | -                 | 2.5%                                              | 10.2%               | 5.2%                               | 1.7%                        | 8.8%                                                   | 2.0%                                       | 2.0%                                  | 0.2%                   | 0.3%             | 0.2%                                                 | 2.2%                 | 0.7%                                      | 0.5%                 |
| Disruptive, impulse-control and conduct disorders      | 2,881              | 6.0%  | 49.7%                 | 41.2%  | 5.9%                             | 16.2%                             | 8.2%                                  | 4.0%              | -                                                 | 5.3%                | 5.1%                               | 1.0%                        | 17.4%                                                  | 0.2%                                       | 0.2%                                  | 0.6%                   | 0.1%             | 0.2%                                                 | 1.5%                 | 4.6%                                      | 0.9%                 |
| Depressive disorder                                    | 2,678              | 5.5%  | 43.9%                 | 41.0%  | 8.5%                             | 8.7%                              | 12.2%                                 | 16.5%             | 7.6%                                              | -                   | 4.2%                               | 4.1%                        | 7.0%                                                   | 1.0%                                       | 1.9%                                  | 0.4%                   | 1.0%             | 0.5%                                                 | 5.2%                 | 2.1%                                      | 0.4%                 |
| Neurodevelopmental disorder: other                     | 1,653              | 3.4%  | 58.9%                 | 24.0%  | 8.3%                             | 12.2%                             | 1.8%                                  | 3.8%              | 3.3%                                              | 1.6%                | -                                  | 0.5%                        | 16.5%                                                  | 2.2%                                       | 0.4%                                  | 0.9%                   | 0.1%             | 0.1%                                                 | 0.3%                 | 0.2%                                      | 0.8%                 |
| Feeding and eating disorder                            | 1,455              | 3.0%  | 68.4%                 | 14.4%  | 5.8%                             | 4.2%                              | 3.6%                                  | 7.6%              | 1.9%                                              | 11.1%               | 1.5%                               | -                           | 2.7%                                                   | 2.4%                                       | 0.5%                                  | 0.6%                   | 0.1%             | 0.1%                                                 | 1.5%                 | 0.1%                                      | 0.2%                 |
| Neurodevelopmental disorder: intellectual disabilities | 862                | 1.8%  | 57.8%                 | 25.8%  | 13.3%                            | 14.4%                             | 6.6%                                  | 3.7%              | 11.1%                                             | 2.0%                | 3.6%                               | 0.1%                        | -                                                      | 1.0%                                       | 0.1%                                  | 0.1%                   | 0.1%             | 0.8%                                                 | 0%                   | 0.7%                                      | 0.9%                 |
| Obsessive-compulsive and related disorders             | 755                | 1.6%  | 53.8%                 | 20.1%  | 12.5%                            | 7.8%                              | 4.0%                                  | 14.6%             | 1.5%                                              | 6.6%                | 6.4%                               | 3.6%                        | 7.0%                                                   | -                                          | 1.1%                                  | 0.5%                   | 0.1%             | 0.1%                                                 | 1.9%                 | 0.1%                                      | 0.1%                 |
| Somatic symptom and related disorders                  | 637                | 1.3%  | 60.9%                 | 21.5%  | 6.0%                             | 6.3%                              | 6.1%                                  | 11.5%             | 1.4%                                              | 10.5%               | 5.8%                               | 1.4%                        | 5.2%                                                   | 0.8%                                       | -                                     | 0.3%                   | 0.2%             | 0.3%                                                 | 2.0%                 | 0%                                        | 0.8%                 |
| Other mental disorders                                 | 257                | 0.5%  | 66.9%                 | 16.0%  | 1.9%                             | 2.7%                              | 2.7%                                  | 2.3%              | 3.9%                                              | 1.6%                | 2.3%                               | 0.8%                        | 17.9%                                                  | 0%                                         | 1.9%                                  | -                      | 0%               | 0%                                                   | 0%                   | 0.8%                                      | 0.4%                 |
| Gender dysphoria                                       | 236                | 0.5%  | 74.6%                 | 45.3%  | 3.8%                             | 3.4%                              | 4.2%                                  | 4.7%              | 1.7%                                              | 11.9%               | 3.8%                               | 0.4%                        | 1.3%                                                   | 0.4%                                       | 0.4%                                  | 0.8%                   | -                | 0.4%                                                 | 1.3%                 | 0%                                        | 0%                   |
| Schizophrenia spectrum and other psychotic disorders   | 211                | 0.4%  | 37.0%                 | 19.0%  | 21.3%                            | 7.1%                              | 9.0%                                  | 5.7%              | 7.1%                                              | 5.7%                | 4.3%                               | 0.9%                        | 30.3%                                                  | 2.4%                                       | 0.9%                                  | 0.9%                   | 0.5%             | -                                                    | 2.4%                 | 7.6%                                      | 0%                   |
| Personality disorder                                   | 204                | 0.4%  | 24.0%                 | 51.5%  | 12.7%                            | 16.7%                             | 16.7%                                 | 19.6%             | 13.2%                                             | 28.4%               | 2.5%                               | 12.7%                       | 7.8%                                                   | 1.0%                                       | 2.9%                                  | 0%                     | 0.5%             | 1.0%                                                 | -                    | 3.4%                                      | 0%                   |
| Substance-related and addictive disorders              | 122                | 0.3%  | 39.3%                 | 41.8%  | 9.0%                             | 13.1%                             | 8.2%                                  | 4.9%              | 27.0%                                             | 7.4%                | 0%                                 | 0.8%                        | 13.9%                                                  | 0%                                         | 1.6%                                  | 0.8%                   | 0%               | 1.6%                                                 | 4.1%                 | -                                         | 0.8%                 |
| Elimination disorder                                   | 67                 | 0.1%  | 55.2%                 | 40.3%  | 9.0%                             | 6.0%                              | 4.5%                                  | 10.4%             | 3.0%                                              | 0%                  | 4.5%                               | 1.5%                        | 13.4%                                                  | 0%                                         | 1.5%                                  | 3.0%                   | 0%               | 0%                                                   | 0%                   | 0%                                        | -                    |
