# Supplementary material for: Patterns of mental disorders in a nationwide child psychiatric sample (N=67,815): A DREAMS study
Source: bioRxiv or medRxiv preprint supplement (doi:10.1101/2024.02.29.24303557), 2024-03-02
Supplement: Supplementary file [file media-3.pdf]

Table S 3. Number of comorbid DSM diagnoses per primary diagnosis.

| Primary DSM diagnosis                                  | Total <i>N</i> | Number of comorbid DSM diagnoses |       |          |       |          |       |           |       |
|--------------------------------------------------------|----------------|----------------------------------|-------|----------|-------|----------|-------|-----------|-------|
|                                                        |                | 0                                |       | 1        |       | 2        |       | 3 or more |       |
|                                                        |                | <i>N</i>                         | %     | <i>N</i> | %     | <i>N</i> | %     | <i>N</i>  | %     |
| Neurodevelopmental disorder: ASD                       | 16,470         | 7,868                            | 47.8% | 5,966    | 36.2% | 2,047    | 12.4% | 589       | 3.6%  |
| Neurodevelopmental disorder: ADHD                      | 11,781         | 6,567                            | 55.7% | 3,685    | 31.3% | 1,201    | 10.2% | 328       | 2.8%  |
| Trauma and stressor-related disorders                  | 4,203          | 2,204                            | 52.4% | 1,283    | 30.5% | 526      | 12.5% | 190       | 4.5%  |
| Anxiety disorders                                      | 3,729          | 2,260                            | 60.6% | 1,000    | 26.8% | 354      | 9.5%  | 115       | 3.1%  |
| Disruptive, impulse-control and conduct disorders      | 2,881          | 1,432                            | 49.7% | 950      | 33.0% | 365      | 12.7% | 134       | 4.7%  |
| Depressive disorder                                    | 2,678          | 1,176                            | 43.9% | 958      | 35.8% | 369      | 13.8% | 175       | 6.5%  |
| Neurodevelopmental disorder: other                     | 1,653          | 973                              | 58.9% | 500      | 30.2% | 144      | 8.7%  | 36        | 2.2%  |
| Feeding and eating disorder                            | 1,455          | 995                              | 68.4% | 318      | 21.9% | 104      | 7.1%  | 38        | 2.6%  |
| Neurodevelopmental disorder: intellectual disabilities | 862            | 498                              | 57.8% | 247      | 28.7% | 97       | 11.3% | 20        | 2.3%  |
| Obsessive-compulsive and related disorders             | 755            | 406                              | 53.8% | 219      | 29.0% | 87       | 11.5% | 43        | 5.7%  |
| Somatic symptom and related disorders                  | 637            | 388                              | 60.9% | 155      | 24.3% | 60       | 9.4%  | 34        | 5.3%  |
| Other mental disorders                                 | 257            | 172                              | 66.9% | 72       | 28.0% | 11       | 4.3%  | 2         | 0.8%  |
| Gender dysphoria                                       | 236            | 176                              | 74.6% | 38       | 16.1% | 15       | 6.4%  | 7         | 3.0%  |
| Schizophrenia spectrum and other psychotic disorders   | 211            | 78                               | 37.0% | 66       | 31.3% | 43       | 20.4% | 24        | 11.4% |
| Personality disorder                                   | 204            | 49                               | 24.0% | 63       | 30.9% | 62       | 30.4% | 30        | 14.7% |
| Substance-related and addictive disorders              | 122            | 48                               | 39.3% | 43       | 35.2% | 21       | 17.2% | 10        | 8.2%  |
| Elimination disorder                                   | 67             | 37                               | 55.2% | 21       | 31.3% | 8        | 11.9% | 1         | 1.5%  |
| Overall                                                | 48,342         | 25,405                           | 52.6% | 15,615   | 32.3% | 5,536    | 11.5% | 1,786     | 3.7%  |
