# Supplementary material for: Patterns of mental disorders in a nationwide child psychiatric sample (N=67,815): A DREAMS study
Source: bioRxiv or medRxiv preprint supplement (doi:10.1101/2024.02.29.24303557), 2024-03-02
Supplement: Supplementary file [file media-10.pdf]

Table S 10. Primary and five year comorbid DSM-5 diagnoses in females aged 0 through 12 years at time of primary diagnosis ( $N = 4,418$ ).

| Primary diagnosis                                      | Comorbid diagnosis |                       |        |                                  |                                   |                                       |                   |                                                   |                     |                                    |                             |                                                        |                                            |                                       |                        |                  |                                                      |                      |                                           |                      |      |  |
|--------------------------------------------------------|--------------------|-----------------------|--------|----------------------------------|-----------------------------------|---------------------------------------|-------------------|---------------------------------------------------|---------------------|------------------------------------|-----------------------------|--------------------------------------------------------|--------------------------------------------|---------------------------------------|------------------------|------------------|------------------------------------------------------|----------------------|-------------------------------------------|----------------------|------|--|
|                                                        | Total              | No comorbid diagnosis | V-code | Neurodevelopmental disorder: ASD | Neurodevelopmental disorder: ADHD | Trauma and stressor-related disorders | Anxiety disorders | Disruptive, impulse-control and conduct disorders | Depressive disorder | Neurodevelopmental disorder: other | Feeding and eating disorder | Neurodevelopmental disorder: intellectual disabilities | Obsessive-compulsive and related disorders | Somatic symptom and related disorders | Other mental disorders | Gender dysphoria | Schizophrenia spectrum and other psychotic disorders | Personality disorder | Substance-related and addictive disorders | Elimination disorder |      |  |
|                                                        | n                  | %                     | %      | %                                | %                                 | %                                     | %                 | %                                                 | %                   | %                                  | %                           | %                                                      | %                                          | %                                     | %                      | %                | %                                                    | %                    | %                                         | %                    | %    |  |
| Neurodevelopmental disorder: ASD                       | 1,314              | 29.7%                 | 57.3%  | 27.5%                            | -                                 | 15.9%                                 | 1.0%              | 3.9%                                              | 2.2%                | 1.3%                               | 7.8%                        | 1.2%                                                   | 15.3%                                      | 0.9%                                  | 0.5%                   | 0.2%             | 0.2%                                                 | 0.0%                 | 0.2%                                      | 0.0%                 | 1.4% |  |
| Neurodevelopmental disorder: ADHD                      | 1,165              | 26.4%                 | 64.4%  | 31.8%                            | 7.5%                              | -                                     | 3.1%              | 3.5%                                              | 6.1%                | 0.5%                               | 9.1%                        | 0.6%                                                   | 12.3%                                      | 0.3%                                  | 0.3%                   | 0.6%             | 0.1%                                                 | 0.0%                 | 0.2%                                      | 0.0%                 | 1.6% |  |
| Trauma and stressor-related disorders                  | 525                | 11.9%                 | 70.1%  | 37.5%                            | 2.7%                              | 8.4%                                  | -                 | 2.7%                                              | 2.9%                | 1.3%                               | 2.3%                        | 0.6%                                                   | 13.7%                                      | 0.0%                                  | 0.0%                   | 0.2%             | 0.2%                                                 | 0.0%                 | 0.0%                                      | 0.0%                 | 0.8% |  |
| Anxiety disorders                                      | 597                | 13.5%                 | 78.7%  | 22.6%                            | 3.5%                              | 4.5%                                  | 2.3%              | -                                                 | 1.5%                | 1.2%                               | 5.2%                        | 0.0%                                                   | 4.9%                                       | 1.3%                                  | 1.5%                   | 0.3%             | 0.2%                                                 | 0.0%                 | 0.3%                                      | 0.0%                 | 0.2% |  |
| Disruptive, impulse-control and conduct disorders      | 183                | 4.1%                  | 68.3%  | 44.3%                            | 2.2%                              | 6.6%                                  | 4.9%              | 3.3%                                              | -                   | 0.0%                               | 6.0%                        | 0.0%                                                   | 12.0%                                      | 0.0%                                  | 0.0%                   | 0.5%             | 0.0%                                                 | 0.0%                 | 0.0%                                      | 0.0%                 | 0.5% |  |
| Depressive disorder                                    | 65                 | 1.5%                  | 50.8%  | 61.5%                            | 7.7%                              | 10.8%                                 | 7.7%              | 9.2%                                              | 7.7%                | -                                  | 4.6%                        | 3.1%                                                   | 6.2%                                       | 0.0%                                  | 0.0%                   | 1.5%             | 0.0%                                                 | 0.0%                 | 3.1%                                      | 0.0%                 | 0.0% |  |
| Neurodevelopmental disorder: other                     | 243                | 5.5%                  | 65.8%  | 22.2%                            | 3.7%                              | 10.3%                                 | 1.2%              | 3.3%                                              | 2.1%                | 0.4%                               | -                           | 0.8%                                                   | 18.5%                                      | 0.4%                                  | 0.4%                   | 0.4%             | 0.0%                                                 | 0.0%                 | 0.4%                                      | 0.0%                 | 0.0% |  |
| Feeding and eating disorder                            | 63                 | 1.4%                  | 68.3%  | 15.9%                            | 4.8%                              | 0.0%                                  | 4.8%              | 6.3%                                              | 6.3%                | 3.2%                               | 3.2%                        | -                                                      | 4.8%                                       | 1.6%                                  | 1.6%                   | 0.0%             | 0.0%                                                 | 0.0%                 | 1.6%                                      | 0.0%                 | 0.0% |  |
| Neurodevelopmental disorder: intellectual disabilities | 98                 | 2.2%                  | 77.6%  | 24.5%                            | 12.2%                             | 7.1%                                  | 4.1%              | 0.0%                                              | 3.1%                | 0.0%                               | 1.0%                        | 0.0%                                                   | -                                          | 0.0%                                  | 0.0%                   | 0.0%             | 0.0%                                                 | 0.0%                 | 0.0%                                      | 0.0%                 | 0.0% |  |
| Obsessive-compulsive and related disorders             | 58                 | 1.3%                  | 60.3%  | 20.7%                            | 10.3%                             | 5.2%                                  | 3.4%              | 25.9%                                             | 0.0%                | 0.0%                               | 3.4%                        | 0.0%                                                   | 1.7%                                       | -                                     | 0.0%                   | 0.0%             | 0.0%                                                 | 0.0%                 | 1.7%                                      | 0.0%                 | 0.0% |  |
| Somatic symptom and related disorders                  | 22                 | 0.5%                  | -      | -                                | -                                 | -                                     | -                 | -                                                 | -                   | -                                  | -                           | -                                                      | -                                          | -                                     | -                      | -                | -                                                    | -                    | -                                         | 0.0%                 | 0.0% |  |
| Other mental disorders                                 | 41                 | 0.9%                  | -      | -                                | -                                 | -                                     | -                 | -                                                 | -                   | -                                  | -                           | -                                                      | -                                          | -                                     | -                      | -                | -                                                    | -                    | -                                         | 0.0%                 | 0.0% |  |
| Gender dysphoria                                       | 14                 | 0.3%                  | -      | -                                | -                                 | -                                     | -                 | -                                                 | -                   | -                                  | -                           | -                                                      | -                                          | -                                     | -                      | -                | -                                                    | -                    | -                                         | 0.0%                 | 0.0% |  |
| Schizophrenia spectrum and other psychotic disorders   | 0                  | 0.0%                  | -      | -                                | -                                 | -                                     | -                 | -                                                 | -                   | -                                  | -                           | -                                                      | -                                          | -                                     | -                      | -                | -                                                    | -                    | -                                         | -                    | -    |  |
| Personality disorder                                   | 3                  | 0.1%                  | -      | -                                | -                                 | -                                     | -                 | -                                                 | -                   | -                                  | -                           | -                                                      | -                                          | -                                     | -                      | -                | -                                                    | -                    | -                                         | 0.0%                 | 0.0% |  |
| Substance-related and addictive disorders              | 0                  | 0.0%                  | -      | -                                | -                                 | -                                     | -                 | -                                                 | -                   | -                                  | -                           | -                                                      | -                                          | -                                     | -                      | -                | -                                                    | -                    | -                                         | -                    | -    |  |
| Elimination disorder                                   | 14                 | 0.3%                  | -      | -                                | -                                 | -                                     | -                 | -                                                 | -                   | -                                  | -                           | -                                                      | -                                          | -                                     | -                      | -                | -                                                    | -                    | -                                         | 0.0%                 | -    |  |
